# Supplementary material
Source: HighWire-hosted journal article supplement (https://www.jneurosci.org/content/38/16/4006)
Supplement: inline-supplementary-material-4 [file inline-supplementary-material-4.docx]

**Manuscript Title: HIPK2-dependent expression of NMDA receptor subunits regulates survival and cell death in neurons**

**Authors: Yulei Sheng, Jiasheng Zhang and Eric J. Huang**

**Files: Extended Data Figures**

**
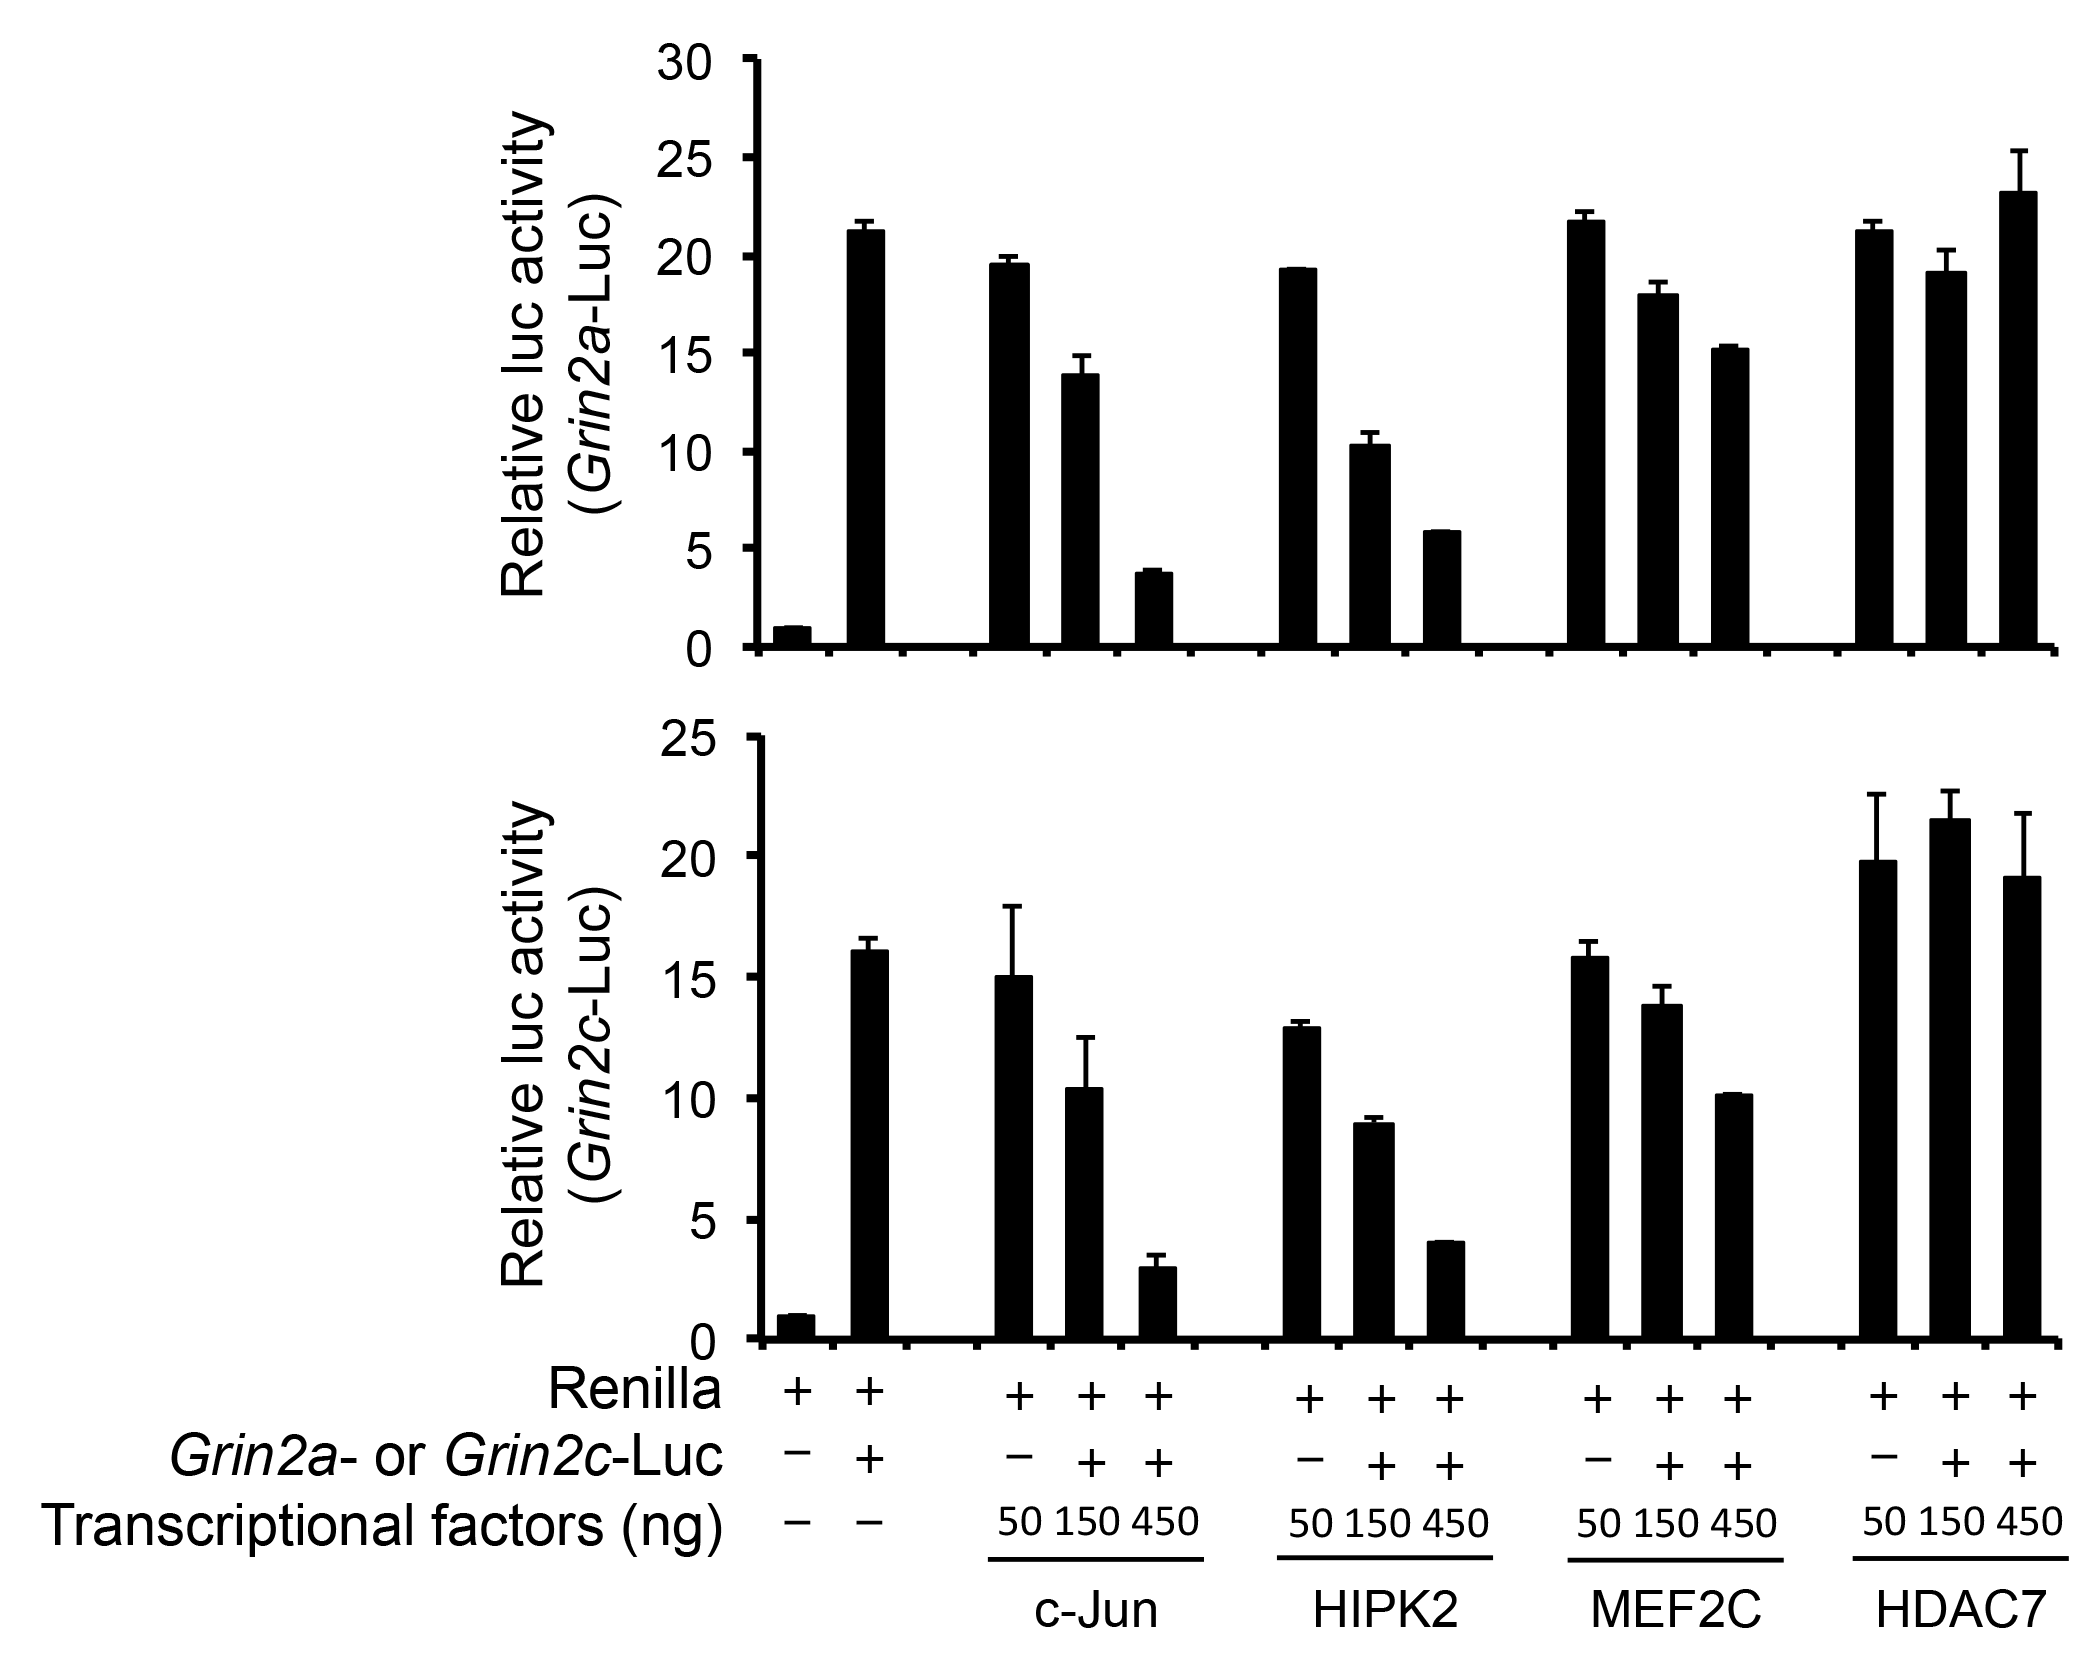
**

**Extended Data Figure 2-1 | HIPK2 suppresses, whereas MEF2C and HDAC7 do not affect, *Grin2a*-Luc and *Grin2c*-Luc reporter activities.**

Expression of HIPK2 or c-Jun alone in COS-7 cells was sufficient to suppress the basal activity of *Grin2a*-Luc and *Grin2c*-Luc reporters. Unlike c-Jun or HIPK2, transcription factor MEF2C and transcriptional cofactor HDAC7, which interact with HIPK2 and regulate vasculogenesis during embryonic development, had very modest or no detectable effects on the *Grin2a*-Luc or *Grin2c*-Luc reporter activity.

**
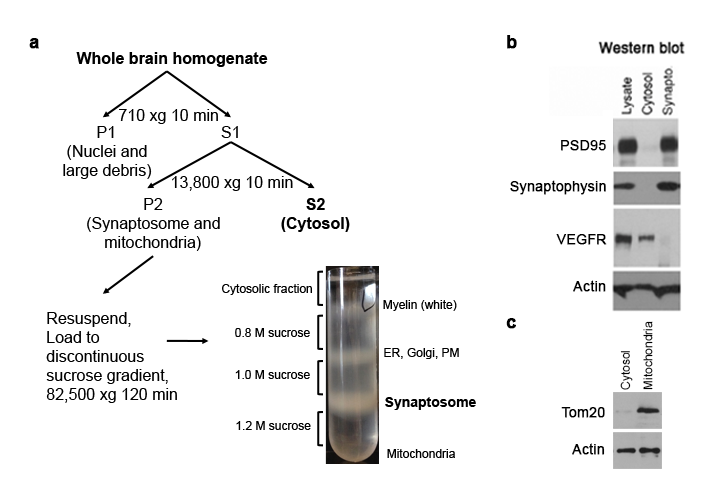
**

**Extended Data Figure 3-1 | Schematic diagram for isolating different subcellular organelles from mouse brain.**

(a) Flow chart illustrating the basic steps for the preparation of cytosolic, synaptosomal, and mitochondrial extracts from 2-month-old mice brain. The procedure requires approximately 3 hour from tissue homogenization to collection of the synaptosomal fraction.

(b-c) Western blot showing the purity of the synaptosomal and mitochondrial fractions. PSD95: post-synaptic marker, Synaptophysin: pre-synaptic marker, VEGFR: a membrane associated protein, Tom20: a translocase of the outer membrane in mitochondria, and Actin: ubiquitous expressed protein as loading control.


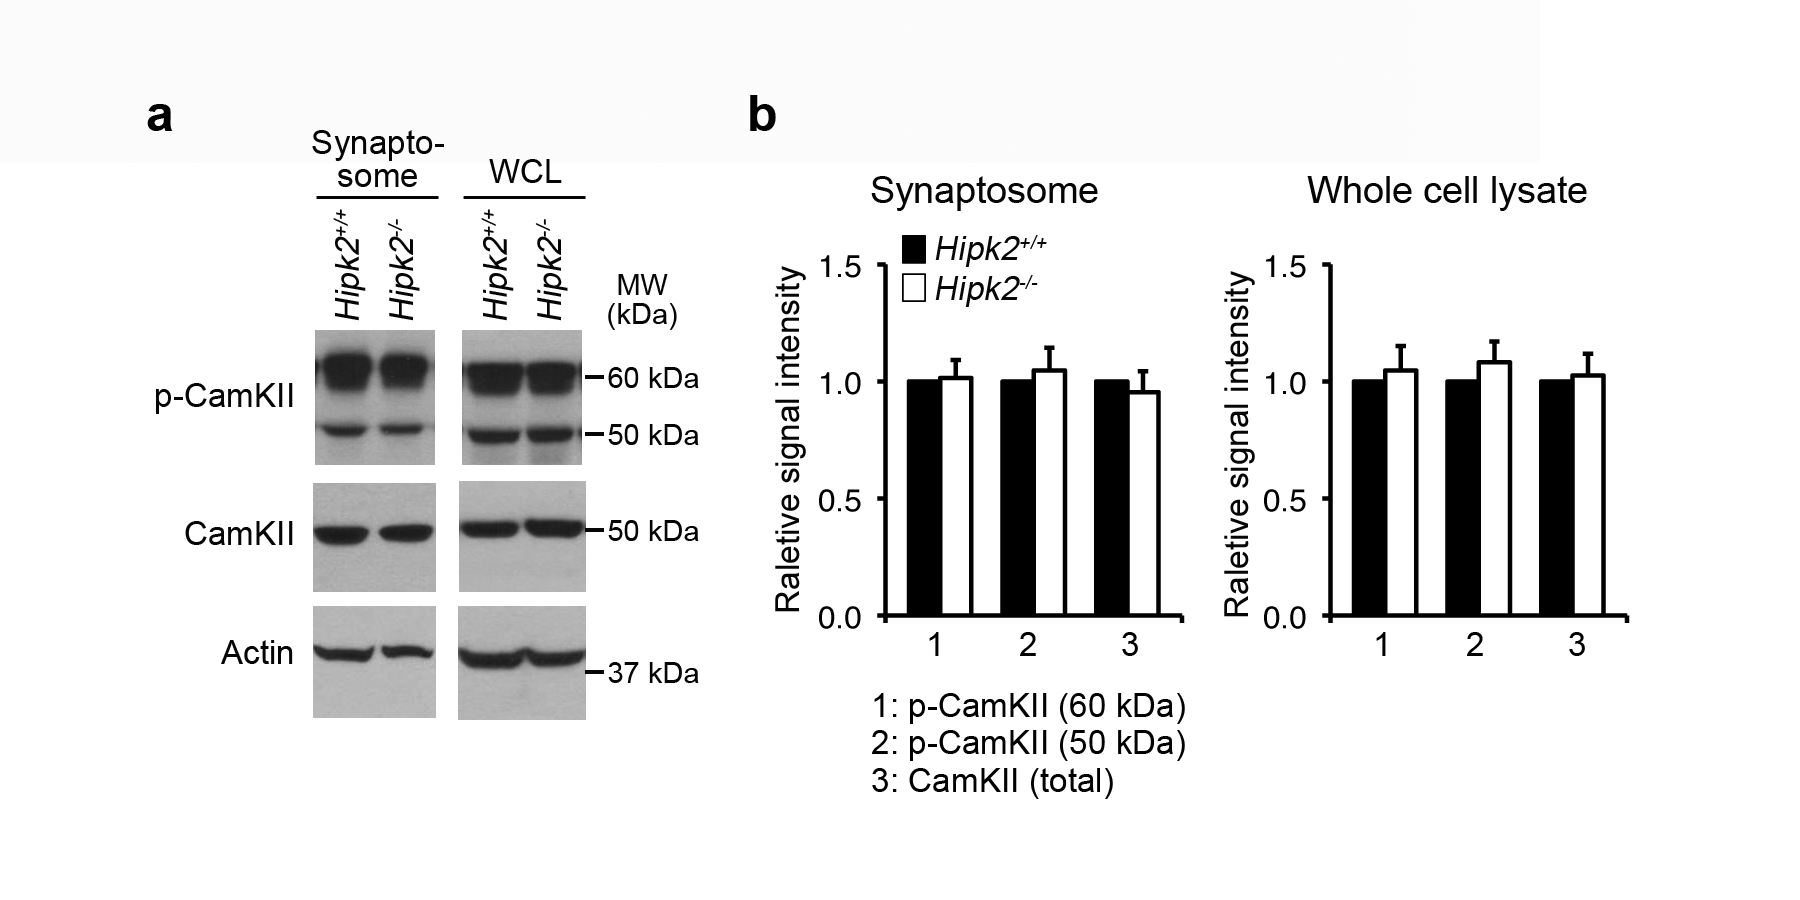


**Extended Data Figure 5-1 | Increased relative abundance of GluN2A and the GluN2A/GluN2B ratio in *Hipk2-/-* mouse brain have no effects on CamKII phosphorylation in synaptosomes.**

(a) The western blot results showed that the p-CamKII and total CamKII protein levels in the whole cell lysates, or in synaptosomes isolated from cerebral cortex of *Hipk2+/+* and *Hipk2-/-*mice.

(b) The quantification results showed comparable signal intensity for p-CamKII and total CamKII in *Hipk2+/+* and *Hipk2-/-* mouse brains. The signal intensity of p-CamKII, total CamKII, and Actin bands was quantified with NIH ImageJ software.


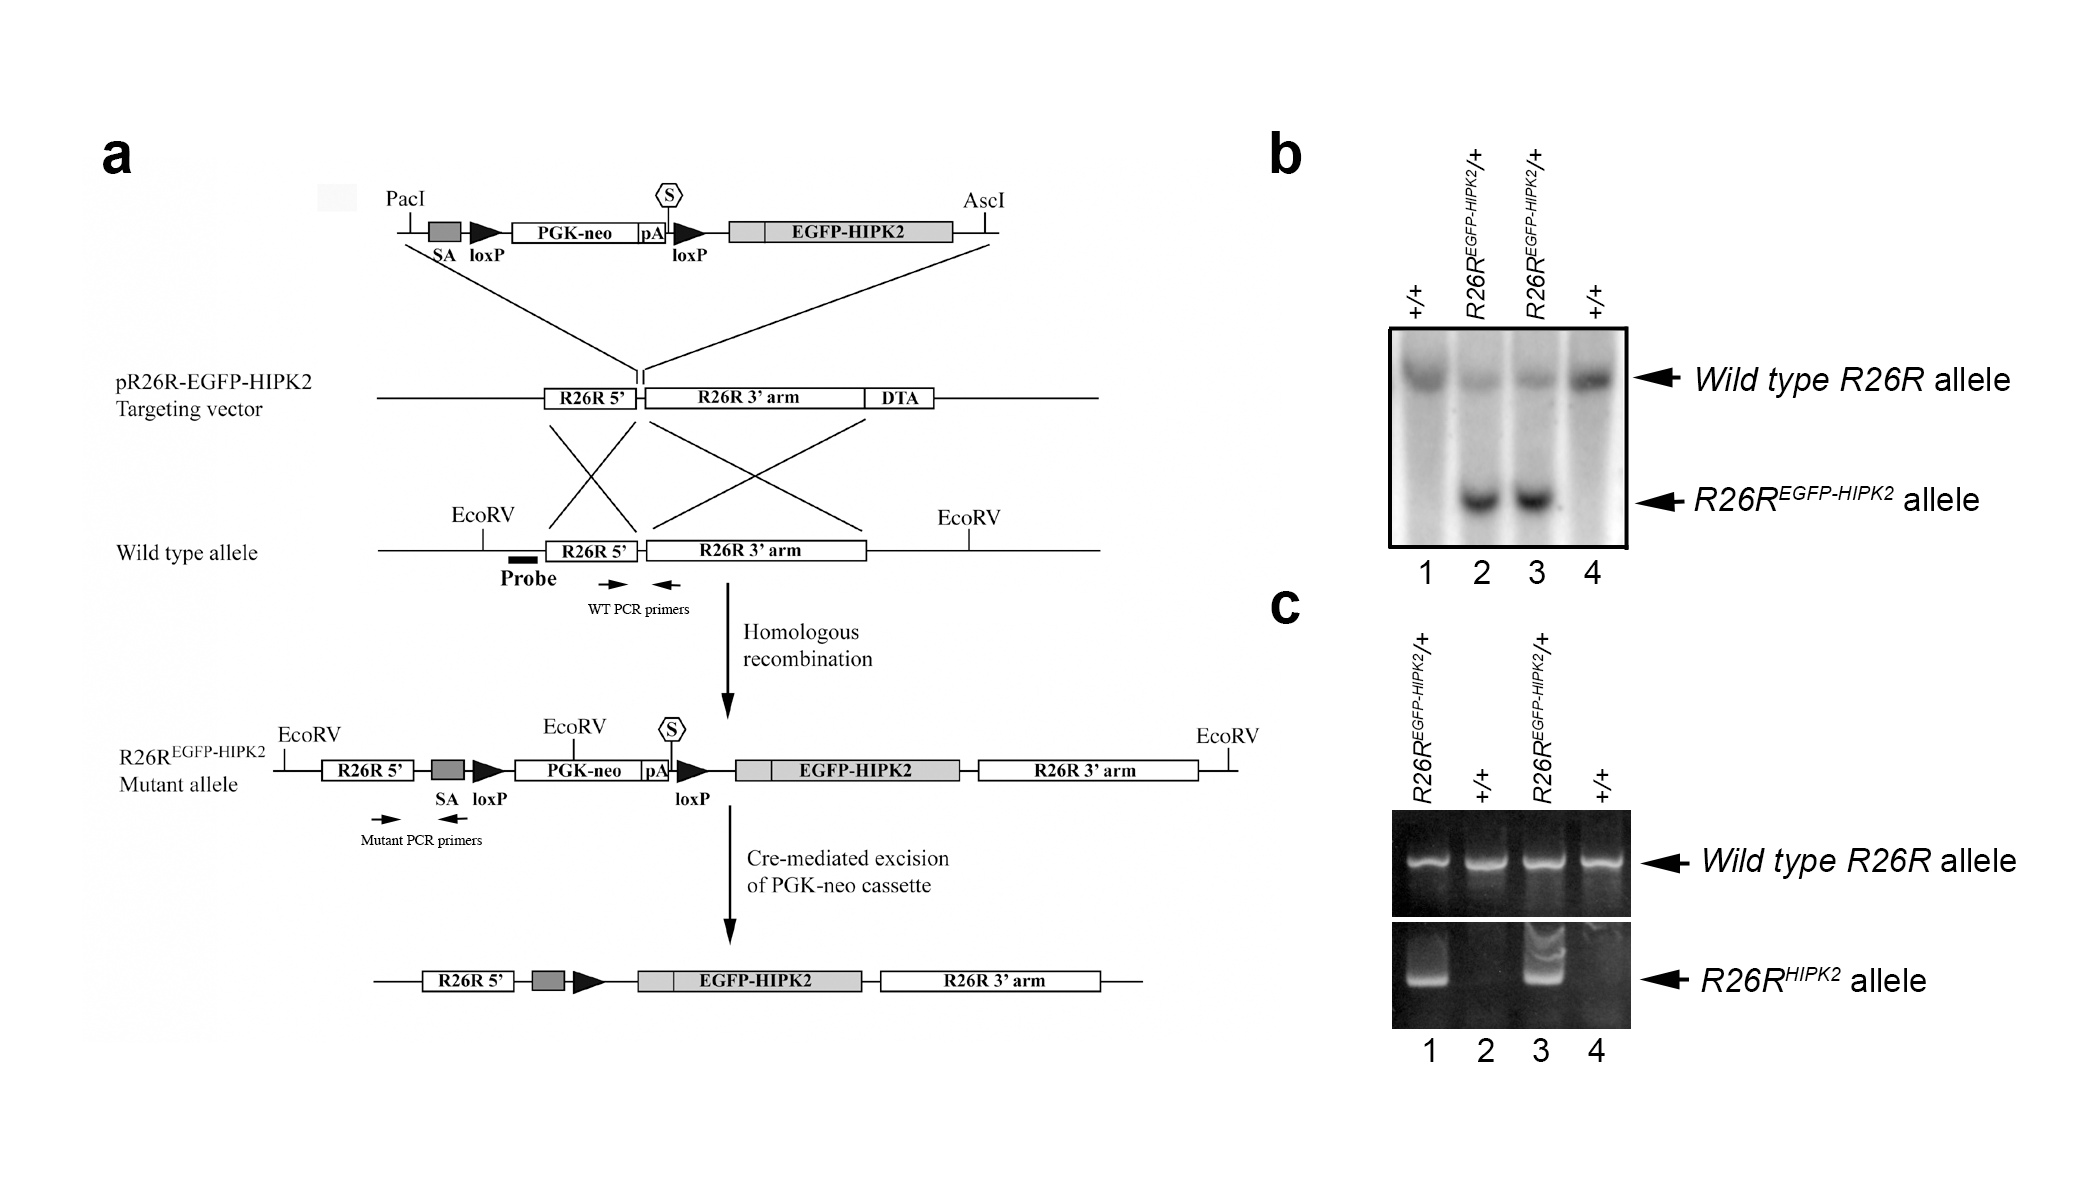


**Extended Data Figure 8-1 | Generation of the conditional “knock-in” allele that expresses EGFP-HIPK2 in a Cre-dependent manner.**

(a) Step-wise construction of the R26RHIPK2 targeting construct by inserting the loxP-PGKneo-STOP-loxP-EGFP-HIPK2 cassette into the R26R locus using homologous recombination. Cre-mediated recombination removes the loxP-PGKneo-STOP-loxP sequence, leading to the expression of EGFP-HIPK2 in a cell type-specific manner.

(b) Genomic DNA from mouse embryonic stem (ES) cells are analyzed using Southern blots and probes that specifically detect the recombined *R26REGFP-HIPK2/+* allele after restriction digestion using the EcoRV enzyme.

(c) Polymerase chain reaction (PCR) using genomic DNA from ES cells to confirm the genotype of *R26REGFP-HIPK2/+* allele.


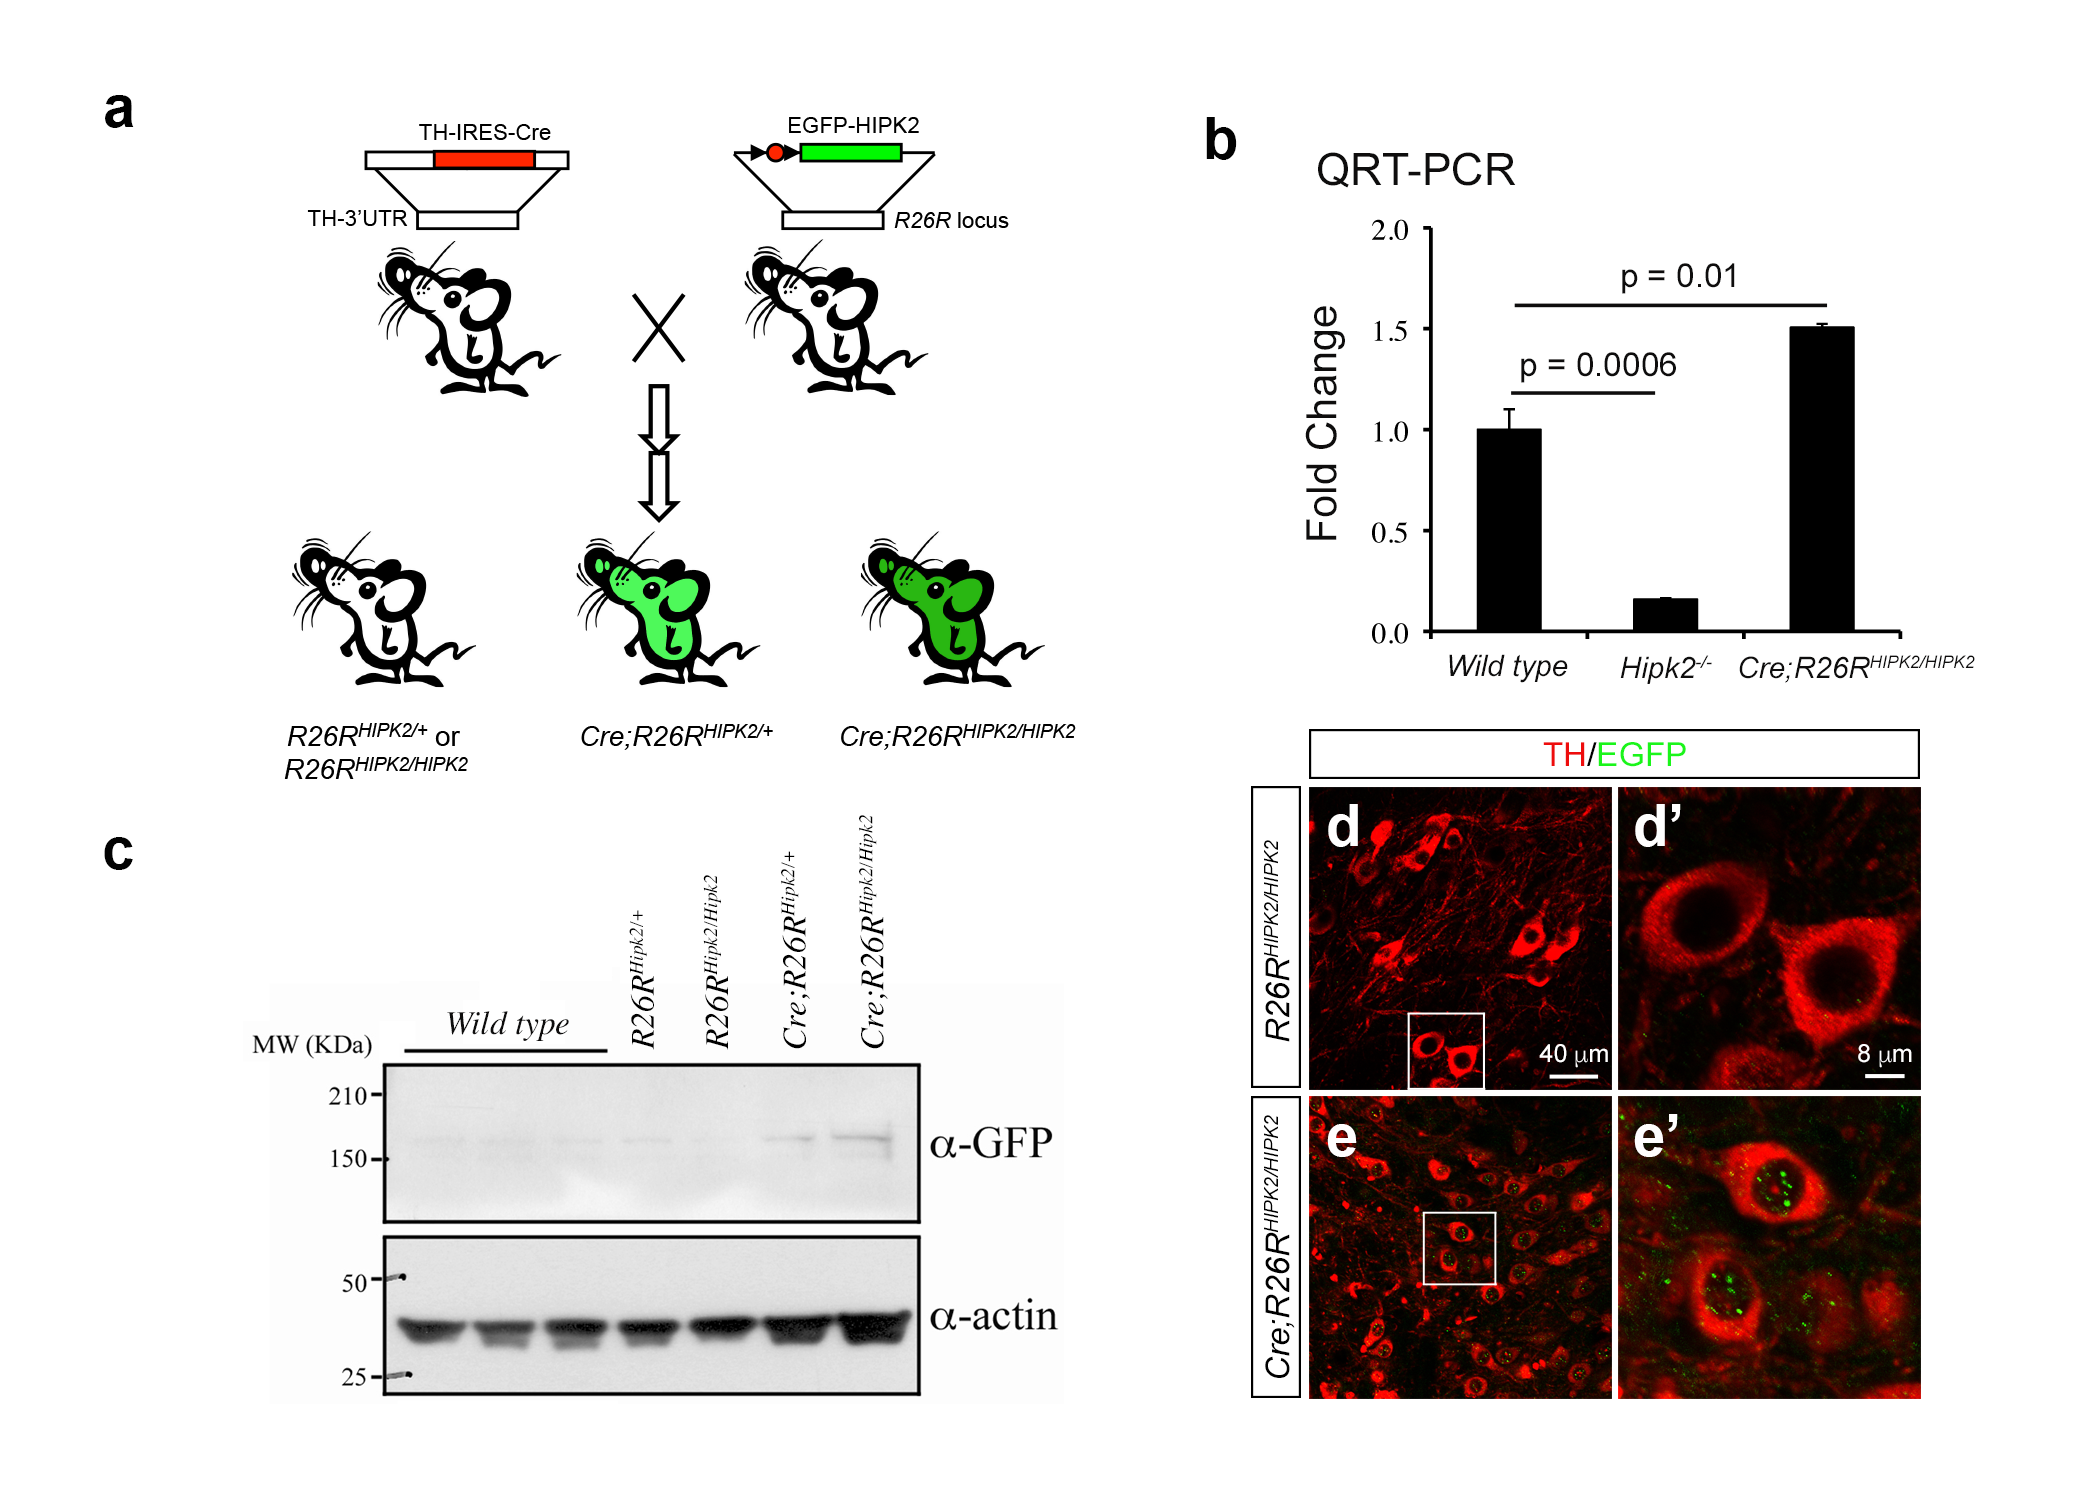


**Extended Data Figure 8-2 | Generation of *TH-IRES-Cre;R26RHIPK2/HIPK2* mice that express additional HIPK2 in DA neurons in the substantia nigra.**

(a) A schematic diagram showing the mating scheme to generate conditional knock-in mice that express EGFP-HIPK2 in DA neurons in the substantia nigra by crossing *TH-IRES-Cre* with *R26RHIPK2* mice.

(b) Quantitative RT-PCR (QRT-PCR) to detect the relative abundance of *Hipk2* mRNA in microdissected substantia nigra tissues from 2 months old *wild type* (*Hipk2+/+*), *Hipk2-/-* and *TH-IRES-Cre;R26RHIPK2/HIPK2* mice. The results show that the substantia nigra of *TH-IRES-Cre;R26RHIPK2/HIPK2* mice contain about 50% increase of *Hipk2* mRNA, whereas there is no *Hipk2* mRNA detected in the substantia nigra of *Hipk2-/-* mice.

(c) Western blots using tissues dissected from the substantia nigra of *wild type* (*Hipk2+/+*), *Hipk2-/-*, *R26RHIPK2/+*, *R26RHIPK2/HIPK2*, *TH-IRES-Cre;R26RHIPK2/+* and *TH-IRES-Cre;R26RHIPK2/HIPK2* mice. Anti-GFP antibody can detect low level of EGFP-tagged HIPK2 fusion proteins in the substantia nigra of *TH-IRES-Cre;R26RHIPK2/+* and *TH-IRES-Cre;R26RHIPK2/HIPK2* mice.

(d-e) Immunofluorescent confocal microscopy using anti-tyrosine hydroxylase (TH) and anti-GFP antibodies in the substantia nigra of *R26RHIPK2/HIPK2* and *TH-IRES-Cre;R26RHIPK2/HIPK2* mice. Scale bar in panel d is 40 μm and in panel d’ 8 μm.
